# Supplementary material
Source: PubMed Central journal article supplement (PMC3436137)
Supplement: supp_M112.363911_jbc.M112.363911-1.pdf [file supp_M112.363911_jbc.M112.363911-1.pdf]

# SLC33A1/AT-1 REGULATES THE INDUCTION OF AUTOPHAGY DOWN-STREAM OF IRE1/XBP1

Mariana Pehar, Mary Cabell Jonas, Theresa M. Hare and Luigi Puglielli

## SUPPLEMENTAL DATA

**Supplemental Table S1.** Primers used in real-time PCR experiments.

| Primer pair   | Sequence                                                                                 | Annealing temperature |
|---------------|------------------------------------------------------------------------------------------|-----------------------|
| AT-1          | Forward: 5'-CAGGCGGTTGGGATGACAGT-3'<br>Reverse: 5'-AAGATTTGCGACGACCGAAGTT-3'             | 55°C                  |
| ATF6          | Forward: 5'-TCGGTTCAGATATTGCTGTGCTAAGG-3'<br>Reverse: 5'-CTCTTCGCTTTGGACTAGGGACTTTAAG-3' | 59°C                  |
| GAPDH         | Forward: 5'-TTTGTCAAGCTCATTTCCTGGTA-3'<br>Reverse: 5'-TTCAAGGGGTCTACATGGCAACTG-3'        | 55°C                  |
| PERK          | Forward: 5'-GGGACTATGGATGGCAATGATGAG-3'<br>Reverse: 5'-GTGGTTGGTCTTGGAGGAGAAATAGAC-3'    | 55°C                  |
| Spliced XBP1* | Forward: 5'-CCGCAGCAGGTGCAGG-3'<br>Reverse: 5'-GAGTCAATACCGCCAGAATCCA-3'                 | 59°C                  |
| Total XBP1*   | Forward: 5'-GCAAGCGACAGCGCCT-3'<br>Reverse: 5'-TTTTTCAGTTTCCTCCTCAGCG-3'                 | 59°C                  |

\* Primers for total and spliced XBP1 were described in Back, S. H., Schroder, M., Lee, K., Zhang, K., and Kaufman, R. J. (2005) *Methods* **35**, 395-416.

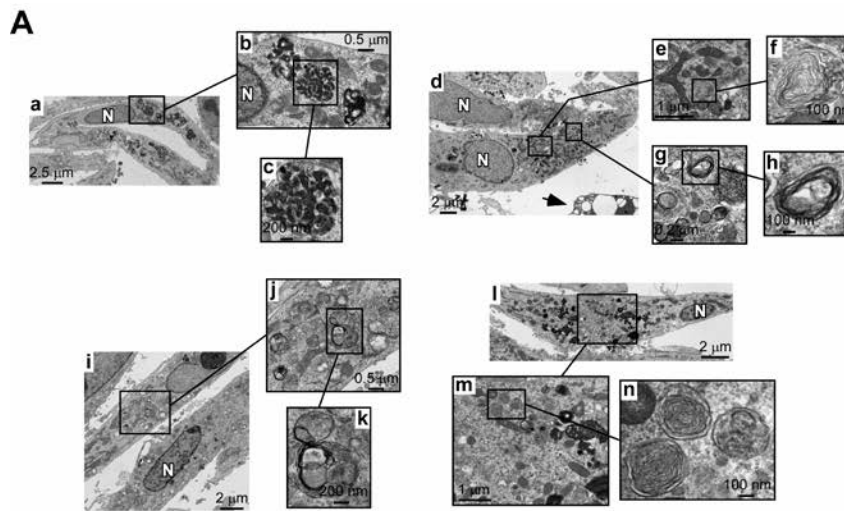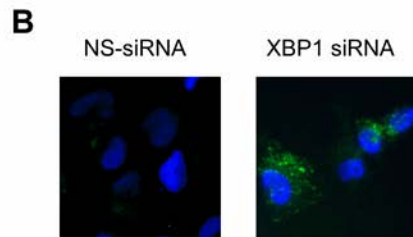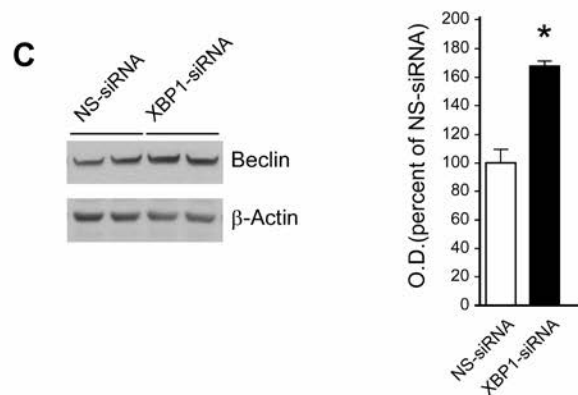

**Supplemental Figure S1.** Down-regulation of XBP1 induces autophagy.

A, H4 cells were treated with the siRNA against XBP1 for 4 days prior to transmission electron microscopy. Different cellular features that are typical of the early stages of autophagy are shown. Nuclei are labeled with N. Mitochondria appear normal. Arrow in *d* points to a cell with advanced autophagic features. B, H4 cells were treated with non-silencing (NS-siRNA) or XBP1-specific (XBP1-siRNA) siRNAs for 3 days and then transduced with BacMan GFP-LC3B. The induction of autophagy, as assessed by the redistribution of LC3B was evaluated 24 hours later. Nuclei were counterstained with DAPI (blue). C, Western blot assessment of beclin levels following 3 days of XBP1-siRNA treatment. Representative images are shown in the left panel while quantitative data is shown in the right panel. \*,  $P < 0.05$ .

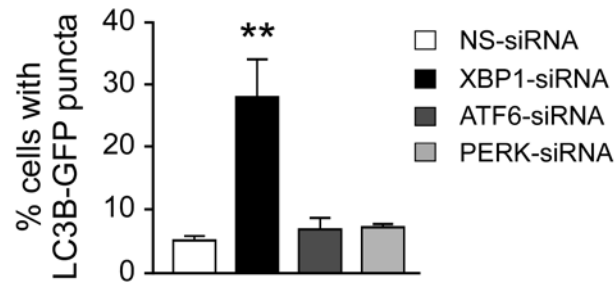

**Supplemental Figure S2.** Down-regulation of ATF6 or PERK does not cause redistribution of LC3B to autophagosomes.

H4 cells were treated with non-silencing (NS-siRNA) or the indicated siRNAs for 3 days prior to BacMan GFP-LC3B transduction. The induction of autophagy, as assessed by the redistribution of LC3B was evaluated 24 hours later. Results are expressed as percent of non-silencing siRNA and are the average ( $n = 3$ )  $\pm$  S.E.M.; \*\*,  $p < 0.005$ .

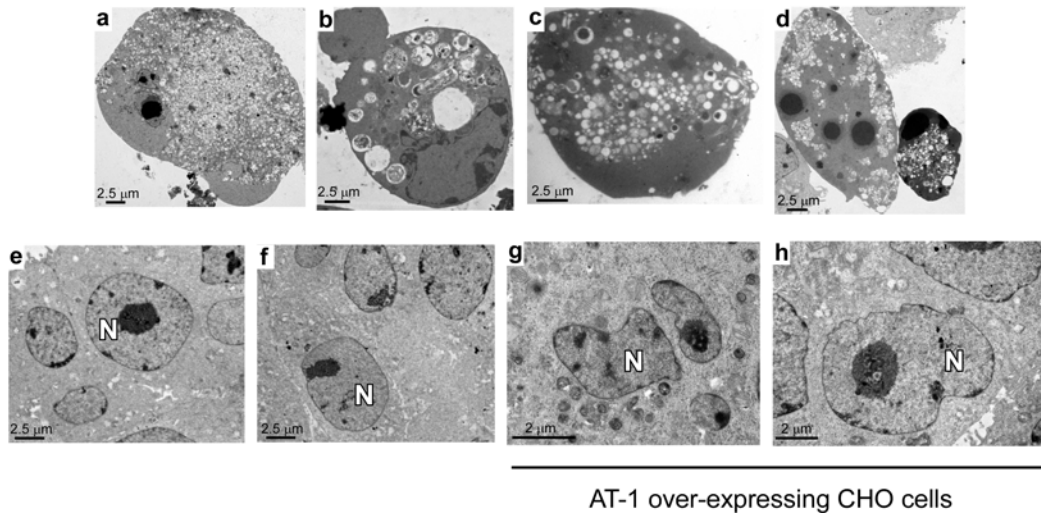

**Supplemental Figure S3.** Over-expression of AT-1 prevents autophagic cell death in Chinese Hamster Ovary (CHO) cells.

CHO cells were treated with siRNA against XBP1 for 4 days prior to transmission electron microscopy.

Panels *a-f* show untransfected CHO cells whereas panels *g-h* show CHO cells over-expressing transgenic AT-1. Panels *a-d*, XBP1-siRNA treated cells; panel *e*, control (untreated) cells; panel *f*, non silencing-siRNA (NS-siRNA) treated cells; panels *g* and *h*, XBP1-siRNA treatment of CHO cells over-expressing transgenic AT-1. Cells in panels *a-d* display features that are typical of autophagic cell death. Cells in *g* and *h* display normal features and no evidence of cell death.

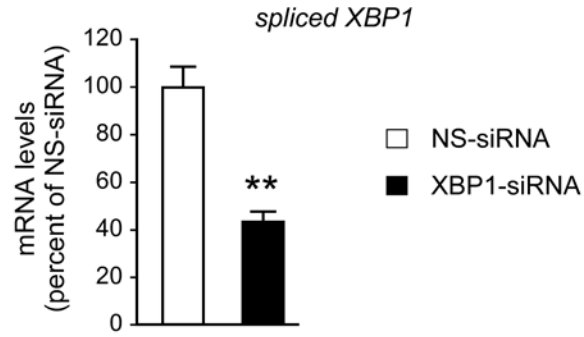

**Supplemental Figure S4.** Successful down-regulation of XBP1 in AT-1 over-expressing cells. H4 cells over-expressing CMV-regulated transgenic AT-1 were treated with the siRNA against XBP1 for 3 days prior to quantitative real-time assessment of sXBP1 mRNA levels. Results are expressed as percent of non-silencing siRNA (NS-siRNA) and are the average ( $n=3$ )  $\pm$  SEM \*\*,  $P<0.005$ .
